# Supplementary material for: VIPERdb v3.0: a structure-based data analytics platform for viral capsids
Source: PubMed Central journal article supplement — Nucleic Acids Res. 2020 Dec 11;49(D1):D809–16. doi: 10.1093/nar/gkaa1096 (PMC7779063; doi:10.1093/nar/gkaa1096), 2020-12-11
Supplement: gkaa1096_supplemental_file.pdf [file gkaa1096_supplemental_file.pdf]

## Supplementary information for

### VIPERdb v3.0: a structure-based data analytics platform for viral capsids

Daniel Montiel-Garcia<sup>1,2</sup>, Nelly Santoyo-Rivera<sup>2</sup>, Phuong Ho<sup>1,§</sup>, Mauricio Carrillo-Tripp<sup>3</sup>, Charles L. Brooks III<sup>4,5,6</sup>, John E. Johnson<sup>1</sup>, Vijay S. Reddy<sup>1\*</sup>

<sup>1</sup>Department of Integrative Structural and Computational Biology, The Scripps Research Institute, La Jolla, CA 92037, USA.

<sup>2</sup>Departments of Computer Systems and Information Technologies, Tecnológico Nacional de Mexico & Instituto Tecnológico Superior de Irapuato, Irapuato, Guanajuato, Mexico.

<sup>3</sup>Biomolecular Diversity Laboratory, Centro de Investigación y de Estudios Avanzados Unidad Monterrey, Vía del Conocimiento 201, Parque PIIT, C.P. 66600, Apodaca, Nuevo León, México.

<sup>4</sup>Department of Computational Medicine and Bioinformatics, <sup>5</sup>Department of Chemistry, <sup>6</sup>Department of Biophysics, University of Michigan, Ann Arbor, MI, USA.

\*Correspondence to Vijay S. Reddy, e-mail: [reddyv@scripps.edu](mailto:reddyv@scripps.edu)

§Current Address: Department of Bioengineering, University of California San Diego, 9500 Gilman Drive, La Jolla, CA 92039, USA.

Table S1. List of tools accessible from the Data menu

| Tool                               | Description of the functionality                                                                                                                   | Location                        |
|------------------------------------|----------------------------------------------------------------------------------------------------------------------------------------------------|---------------------------------|
| Family Index                       | Shows a list of structures available in a specific virus family                                                                                    | Menu Data-> Family index        |
| Genus Index                        | Shows a list of structures available in a specific virus genus                                                                                     | Menu Data-> Genus index         |
| T-number Index                     | Shows a list of structures with specific icosahedral organization (e.g., T=1, T=3 etc.,)                                                           | Menu Data-> T-number index      |
| X-Ray Structures                   | Shows a list of structures that are determined by X-Ray crystallography                                                                            | Menu Data-> X-Ray index         |
| Cryo-EM Structures                 | Shows a list of structures that are determined by Cryo-electron microscopy (cryo-EM).                                                              | Menu Data-> Cryo-EM index       |
| Model Structures                   | Shows a list of structures that are built using homology modelling methods.                                                                        | Menu Data-> Model index         |
| Helical Structures                 | Shows a list of helical virus structures.                                                                                                          | Menu Data-> Helical structures  |
| Other Structures (non-icosahedral) | Shows a list of non-icosahedral virus structures (e.g., Geminiviruses)                                                                             | Menu Data-> Other structures    |
| Crystal Information                | Provides the details of crystallization conditions, space groups and inter-particle contacts for a limited number of crystal structures of viruses | Menu Data-> Crystal information |

Table S2. List of web-based tools accessible from the Utilities menu

| Tool                                         | Description of the functionality                                                                                                                                                                                    | Location                                                      |
|----------------------------------------------|---------------------------------------------------------------------------------------------------------------------------------------------------------------------------------------------------------------------|---------------------------------------------------------------|
| Oligomer Generator                           | Allows to build coat protein oligomers of choice (e.g., dimers, pentamers, half-virus particle)                                                                                                                     | Menu Utilities-> Oligomer generator                           |
| Submit to Viper                              | Allows the users to submit their coordinates for structural analysis and generate VIPERdb style web-pages. This tool requires manual intervention by the VIPERdb curators.                                          | Menu Utilities-> Submit to Viper                              |
| Web API                                      | Provides a list of APIs available and the necessary syntax for using the API services.                                                                                                                              | Menu Utilities-> Web API                                      |
| Reposition a capsid at the center of a box   | Repositions a capsid at the center of a box                                                                                                                                                                         | Menu Utilities-> Reposition a capsid at the center of a box   |
| Icosahedral Server                           | Provides the details and images of various T-numbered lattices, corresponding h, k indices, paper templates of the hexagonal net and instructions on how to fold them into specific T-numbered icosahedral capsids. | Menu Utilities-> Icosahedral server                           |
| Gallery Maker                                | Gallery Maker Generates montage of various graphical representations of viral capsids and coat protein subunits available in the database, grouped according to their genus/family                                  | Menu Utilities-> Gallery Maker                                |
| Contact Finder                               | Lists the occurrences of a specific residue pair (e.g., Asp-Arg) and its associated properties present at subunit interfaces in all or a chosen group of viruses.                                                   | Menu Utilities-> Contact Finder                               |
| Icosahedral Matrices                         | Provides with a list of 60 icosahedral rotation matrices in VIPER standard orientation.                                                                                                                             | Menu Utilities-> Icosahedral Matrices                         |
| Amino Acid Info                              | Provides the annotation of each amino acid in the capsid in terms of its properties and contributions (e.g., residue type, contacts, association energies, location).                                               | Menu Utilities-> Amino acid info                              |
| Secondary Structure Info                     | Maps the predicted secondary structure information onto the amino acid sequence of the selected CP subunit(s).                                                                                                      | Menu Utilities-> Secondary structure info                     |
| Multiple structure sequence alignment (MSSA) | Aligns multiple structures and derives the structure-based sequence alignment and annotates the aligned residues with their respective structural roles.                                                            | Menu Utilities-> Multiple structure sequence alignment (MSSA) |
| Anomaly detection tool                       | Identifies the capsid outliers within a virus family based on the structural descriptors.                                                                                                                           | Menu Utilities-> Anomaly detection tool                       |
| Capsid Map Tool                              | Display 2D and 3D representation of the CPs in IAU for various structural interrogations.                                                                                                                           | Menu Utilities-> Capsid maps tool                             |
| PDB to VIPER                                 | Utility that transforms the PDB coordinates into VIPER convention based on BIOMT matrices stored in the PDB files.                                                                                                  | Menu Utilities-> PDB to VIPER                                 |

Table S3. Information accessed from the info\_page

| Tool                            | Information provided                                                                                                                                                                                                                                                                                                                                                                                                                                          | Location                                                                                            |
|---------------------------------|---------------------------------------------------------------------------------------------------------------------------------------------------------------------------------------------------------------------------------------------------------------------------------------------------------------------------------------------------------------------------------------------------------------------------------------------------------------|-----------------------------------------------------------------------------------------------------|
| Info_page                       | Detailed description of each virus in terms of virus taxonomy, capsid dimensions, architecture, pictorial representations and structure-derived annotations.                                                                                                                                                                                                                                                                                                  | Can be accessed by specifying PDB-ID or virus name in the search window or via hyperlinks provided. |
| Illustrations                   | Various kinds of pictorial representations generated using UCSF Chimera, TexMol and Molscrip.                                                                                                                                                                                                                                                                                                                                                                 | Illustrations tab                                                                                   |
| Fold-a-Virus                    | An illustration of flattened capsid (icosahedron) that can be downloaded printed and folded into a paper model of a capsid. These illustrations were generated by UCSF Chimera program (1) using the script file courtesy of Drs. Tom Goddard of UCSF and Padmaja Natarajan of TSRI.                                                                                                                                                                          | Fold-a-Virus tab                                                                                    |
| JsMol                           | A JsMol utility to interact with the atomic models in the icosahedral asymmetric unit (I.A.U).                                                                                                                                                                                                                                                                                                                                                                | JsMol tab                                                                                           |
| Capsid Maps                     | A Google Maps based utility that maps (projects) various structure-derived annotations onto the space of icosahedral asymmetric unit and enables one to compare the interfaces of different capsids. See Carrillo-Tripp et al (2,3) for further description.                                                                                                                                                                                                  | Capsid Maps tab                                                                                     |
| Related viruses                 | Provides a list of virus structures that belong to the same family or genus that are available in VIPERdb.                                                                                                                                                                                                                                                                                                                                                    | Related viruses tab                                                                                 |
| Accessible surface profiles     | Identifies the surface exposed residues in each (unique) subunit. Mouse over the graph, pointing at the data points, to identify residues that are highly surface exposed (i.e., peaks). Click on the link "how are these calculated" (at the top) for more information.                                                                                                                                                                                      | Accessed through Annotations tab.                                                                   |
| Contact Tables                  | Shows a table of residue pairs that are in contact at various subunit interfaces.                                                                                                                                                                                                                                                                                                                                                                             | Accessed through Annotations tab.                                                                   |
| Association Energies            | A table of unique subunit-subunit interfaces and their estimated association energies and buried surface areas sorted in the decreasing order of the strength of their binding energies. Association energies are calculated based on the buried surface areas and atomic solvation parameters as described in references cited at the bottom of the table. It also identifies the symmetry operation associated with generating the corresponding interface. | Accessed through Annotations tab.                                                                   |
| Q-Scores                        | Provides correspondence between (unique) pairs of interfaces, estimated based on the equivalent pairs of contacting residues and measured in terms of Q-scores (See Damodaran et al (4)). The Q-scores vary between 0 and 1. The higher the Q-score (closer to 1) the greater the correspondence/similarity between the pairs of interfaces.                                                                                                                  | Accessed through Annotations tab.                                                                   |
| Construct oligomer of the virus | Provides a direct link to the oligomer generator utility.                                                                                                                                                                                                                                                                                                                                                                                                     | Accessed through Annotations tab.                                                                   |
| Secondary Structure             | Provides a direct link to the secondary structure prediction utility.                                                                                                                                                                                                                                                                                                                                                                                         | Accessed through Annotations tab.                                                                   |

## References

1. Pettersen, E.F., Goddard, T.D., Huang, C.C., Couch, G.S., Greenblatt, D.M., Meng, E.C. and Ferrin, T.E. (2004) UCSF Chimera--a visualization system for exploratory research and analysis. *J Comput Chem*, **25**, 1605-1612.
2. Carrillo-Tripp, M., Brooks, C.L., 3rd and Reddy, V.S. (2008) A novel method to map and compare protein-protein interactions in spherical viral capsids. *Proteins*, **73**, 644-655.
3. Carrillo-Tripp, M., Montiel-Garcia, D.J., Brooks, C.L., 3rd and Reddy, V.S. (2015) CapsidMaps: protein-protein interaction pattern discovery platform for the structural analysis of virus capsids using Google Maps. *J Struct Biol*, **190**, 47-55.
4. Damodaran, K.V., Reddy, V.S., Johnson, J.E. and Brooks, C.L., III. (2002) A general method to quantify quasi-equivalence in icosahedral viruses. **324**, 723-737.
